# Supplementary material for: Nano- and micro-structural control of WO3 photoelectrode films through aqueous synthesis of WO3·H2O and (NH4)0.33WO3 precursors
Source: Royal Society of Chemistry journal article supplement (doi:10.1039/d0ra01321h), 2020-01-01
Supplement: d0ra01321h1.pdf [file d0ra01321h1.pdf]

# Nano- and micro-structural control of $\text{WO}_3$ photoelectrode films through aqueous synthesis of $\text{WO}_3 \cdot \text{H}_2\text{O}$ and $(\text{NH}_4)_{0.33}\text{WO}_3$ precursors

Hiroaki Uchiyama\* and Yuki Nagayasu

E-mail address: [h\\_uchi@kansai-u.ac.jp](mailto:h_uchi@kansai-u.ac.jp) (H. Uchiyama).

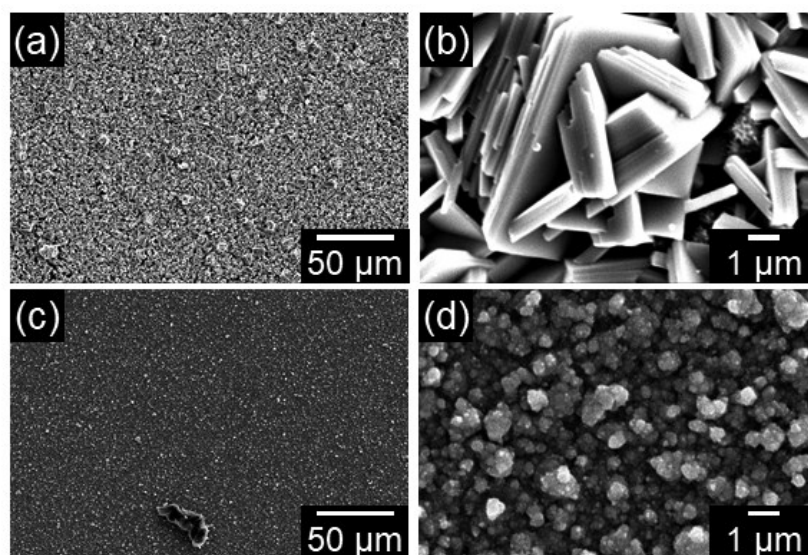

**Fig. S1** SEM images of the  $\text{WO}_3$  precursor layers prepared on silica glass substrates at  $x = 0.17$  mM (aging at 60 °C for 3 days) (a–b) and 8.5 mM (aging at 50 °C for 1 day) (c–d).
